# Supplementary material
Source: PubMed Central journal article supplement (PMC2366817)
Supplement: NIHMS41744-supplement-Sup_Fig_2.pdf [file NIHMS41744-supplement-Sup_Fig_2.pdf]

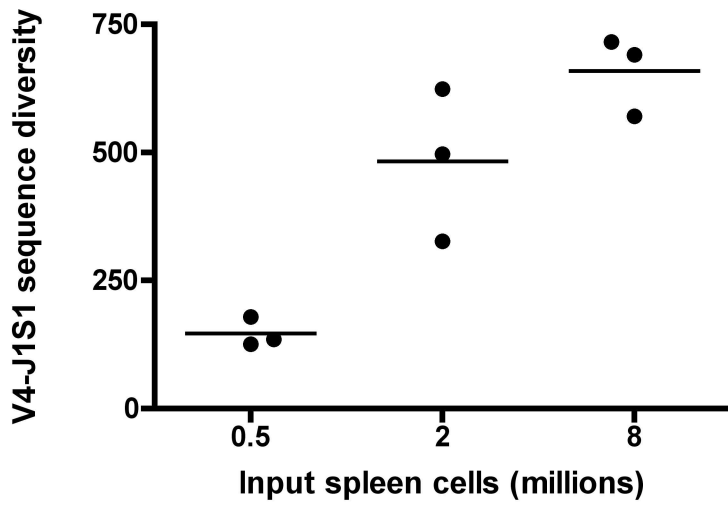

**Supplementary Figure 2.** Interassay variability.

Samples of  $0.5$ ,  $2$ , and  $8 \times 10^6$  unsorted spleen cells were taken in triplicate from the same mouse, and then independently processed and analyzed with AmpliCot. Samples were normalized to a single clone standard. The coefficient of variation was 21%.
