# Supplementary material
Source: PubMed Central journal article supplement (PMC2366817)
Supplement: NIHMS41744-supplement-Sup_Meth.pdf [file NIHMS41744-supplement-Sup_Meth.pdf]

## SUPPLEMENTARY METHODS

### **Oligonucleotide templates**

Ninety-six oligonucleotides (Lumina) were individually synthesized according to the format

GCTGGCGCAGAAATATACAGGTCGGACCTCAGCTG(NNNN)<sub>4</sub>

CCTCAGCACCTCC in which NNNN represents one of the four nucleotide words AATC, ATCA, TCTA, CAAA, TTAC, TACT, ACAT, or CTTT. We amplified template mixtures of known diversities between 1 and 96 (containing 1 fmol of each component sequence) with primers flanking the variable region of the templates (P1 and P2, both at 0.3  $\mu$ M final concentration) in 100  $\mu$ L PCR reactions with 1.5 mM MgCl<sub>2</sub>, using 40 cycles and an annealing temperature of 55°C, yielding 52 bp products. We used the method of Thompson et al.<sup>1</sup> to isolate homoduplexes: first-round PCR products were diluted 1:10 in fresh reaction mixes and further amplified for three cycles. Finally, we removed single-stranded DNA by incubating with 40 units of exonuclease I (NEB) at 37°C for 60 min.

### **Mouse strains**

C57BL/6 (Jackson Labs) and terminal deoxynucleotidyl transferase knockout mice<sup>2</sup> B6.129S2-*Dntt*<sup>tm1Gjn</sup> (Taconic) were housed in modified specific-pathogen-free conditions. The protocol was approved by the UCSF Institutional Animal Care and Use Committee.

### **Isolation and sort purification of splenic T and non-T cell subpopulations**

Spleens and thymi were dissociated through 70  $\mu$ m mesh screens; mononuclear cells (primarily lymphocytes) were further purified with a Histopaque-1083 gradient (Sigma). For the diversity titration experiment, we sorted splenic T and non-T cells on a FACS Vantage (Becton-Dickinson) using a FITC-CD3 antibody (Becton-Dickinson) and propidium iodide to exclude dead cells. For all other experiments, splenic T cells were enriched using a negative selection kit for CD3+ cells (Cell Sep; Stem Cell). Memory and naïve splenic T cells and various thymocyte subpopulations were sorted using the antibodies PerCP-CD4, APC-CD8a, FITC-CD44, and PE-CD62L (Becton-Dickinson) along with propidium iodide exclusion. All sorts exceeded 99% purity. Cells were counted with a Coulter counter, suspended in RNeasy buffer RLT (Qiagen), and homogenized with QiaShredder columns before freezing at -80°C.

### **Real-time PCR**

cDNA samples were amplified using universal primers to the C region of the TCR $\beta$  chain (CQ1 and CQ2). Results were normalized to parallel reactions using primers to  $\beta$ -actin (Maxim Biotech; proprietary sequences). Samples were amplified using SYBR Green mastermix (Applied Biosystems) on an ABI 7700 real-time PCR machine.

### **Nondenaturing gel electrophoresis**

After incubation at the annealing temperature, we loaded samples and references onto an 8% polyacrylamide TBE minigel (Invitrogen). We visualized duplexes using the SYBR Green dye already present in the annealing mix, by scanning with a Typhoon imager (Amersham). The entire image was adjusted in Photoshop (Adobe) to increase contrast.

### Immunoscope

V-J PCR products were generated as with the AmpliCot protocol, except that the J primer was 5' labeled with 6-FAM. 1 uL of the PCR reaction, mixed with 9 uL formamide and ROX-350 markers (Applied Biosystems), was run on an ABI3100 capillary electrophoresis machine (Applied Biosystems) and analyzed using GeneMapper software<sup>3</sup>.

### Oligonucleotide sequences

| Name | Sequence                   |
|------|----------------------------|
| P1   | TACAGGTCGGACCTCAGCTG       |
| P2   | GGCGGAGGTGCTGAGG           |
| CQ1  | GCAGTTCCATGGGCTTTCAG       |
| CQ2  | ACAGTCTGCTCGGCCCCAG        |
| V4   | GGCCACATACTTCTGTGCCAGC     |
| C    | GGGTGGAGTCACATTTCTCAGATCCT |
| J1-1 | CTGGTTCCTTTACCAAAGAAGACT   |

- 
1. Thompson, J.R., Marcelino, L.A. & Polz, M.F. Heteroduplexes in mixed-template amplifications: formation, consequence and elimination by 'reconditioning PCR'. *Nucleic Acids Research* **30**, 2083-2088 (2002).
  2. Gilfillan, S., Dierich, A., Lemeur, M., Benoist, C. & Mathis, D. Mice lacking TdT: mature animals with an immature lymphocyte repertoire. *Science* **261**, 1175-1178 (1993).
  3. Pannetier, C., Even, J. & Kourilsky, P. T-cell repertoire diversity and clonal expansions in normal and clinical samples. *Immunol Today* **16**, 176-181 (1995).
